# Supplementary material for: Long-term consequences of alcohol misuse in Scottish military veterans
Source: HighWire-hosted journal article supplement (doi:10.1136/oemed-2014-102234), 2014-10-01
Supplement: oemed-2014-102234supp.pdf [file oemed-2014-102234supp.pdf]

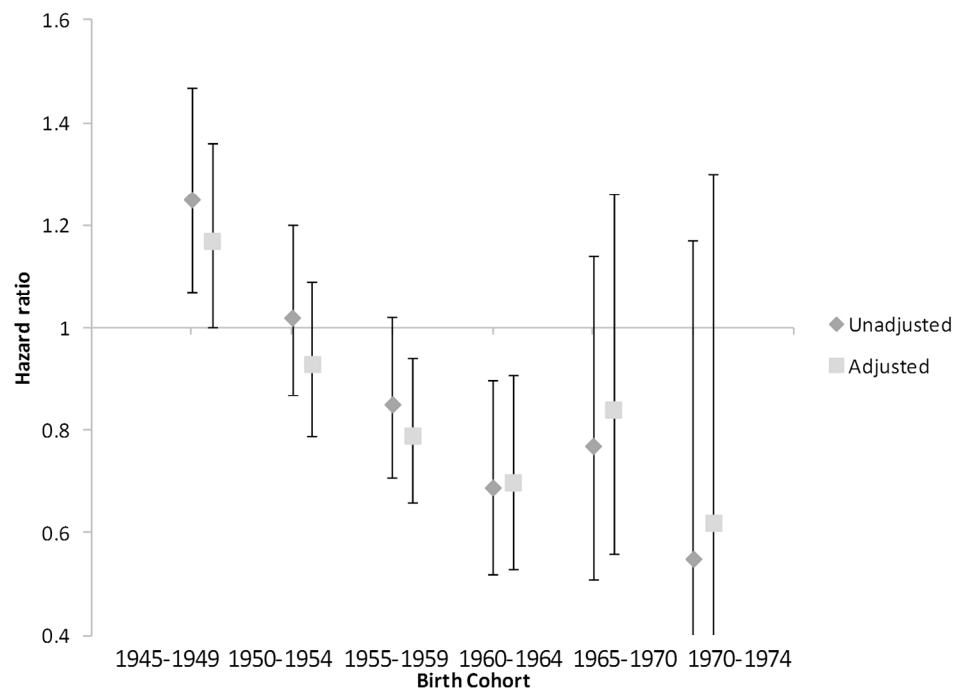

Online supplementary figure. Hazard ratios for alcoholic liver disease in veterans referent to non-veterans, by birth cohort
